# Supplementary material
Source: Research Square preprint supplement (doi:10.21203/rs.3.rs-9637397/v1)
Supplement: Supplementary file 1 [file 4da038068084bdc357c3af31.docx]

Supplementary material

# **Additional Table A1. Inter- and intra-reader agreement (Cohen κ) overall and per feature for 13 prespecified MR descriptors**

| **MR feature** | **Inter-reader κ** | **Inter-reader 95% CI** | **Intra-reader κ (Reader 1)** | **Reader 1 95% CI** | **Intra-reader κ (Reader 2)** | **Reader 2 95% CI** |
| --- | --- | --- | --- | --- | --- | --- |
| T1 signal heterogeneity | 0.78 | 0.69–0.87 | 0.85 | 0.77–0.93 | 0.76 | 0.67–0.85 |
| T2 signal heterogeneity | 0.82 | 0.74–0.90 | 0.88 | 0.81–0.95 | 0.80 | 0.72–0.88 |
| Heterogeneous gadolinium enhancement | 0.84 | 0.76–0.92 | 0.90 | 0.84–0.96 | 0.82 | 0.74–0.90 |
| Peritumoral enhancement | 0.81 | 0.72–0.90 | 0.87 | 0.80–0.94 | 0.79 | 0.70–0.88 |
| Peritumoral edema | 0.88 | 0.81–0.95 | 0.93 | 0.88–0.98 | 0.86 | 0.78–0.94 |
| Intratumoral necrosis | 0.85 | 0.77–0.93 | 0.90 | 0.84–0.96 | 0.83 | 0.75–0.91 |
| Central necrosis | 0.89 | 0.82–0.96 | 0.94 | 0.89–0.99 | 0.87 | 0.80–0.94 |
| Tumor margin (well-defined vs infiltrative)* | 0.76 | 0.66–0.86 | 0.83 | 0.75–0.91 | 0.74 | 0.64–0.84 |
| Neurovascular encasement | 0.92 | 0.86–0.98 | 0.96 | 0.92–1.00 | 0.90 | 0.84–0.96 |
| Bone invasion | 0.95 | 0.90–1.00 | 0.98 | 0.95–1.00 | 0.93 | 0.87–0.99 |
| Osseous marrow involvement | 0.93 | 0.87–0.99 | 0.96 | 0.92–1.00 | 0.91 | 0.85–0.97 |
| Intratumoral hemorrhage | 0.87 | 0.80–0.94 | 0.91 | 0.85–0.97 | 0.85 | 0.77–0.93 |
| Fluid–fluid levels | 0.94 | 0.88–1.00 | 0.97 | 0.93–1.00 | 0.92 | 0.86–0.98 |
| **Overall (all 13 features)** | **0.86** | **0.80–0.92** | **0.91** | **0.86–0.96** | **0.84** | **0.78–0.90** |

***Note.*** Values are Cohen κ with 95% confidence intervals computed from the 158-patient cohort. Two radiologists (Reader 1, 15 years’ experience; Reader 2, 6 years’ experience) independently scored each examination while blinded to clinical outcome and histologic grade. Reader 1 rescored all examinations after an 8-week washout to estimate intra-reader agreement. κ values are interpreted per Landis and Koch: 0.00–0.20 slight; 0.21–0.40 fair; 0.41–0.60 moderate; 0.61–0.80 substantial; 0.81–1.00 almost perfect.

***** Tumor margin was scored on an ordinal scale (well-defined / lobulated / infiltrative); values shown are linear-weighted κ. All other features were scored as present/absent and analyzed with unweighted κ.

*Abbreviations:* CI = confidence interval; MR = magnetic resonance; κ = Cohen kappa coefficient.

**Additional Table A2. Histology-adjusted sensitivity analyses. Panels A–C show the multivariable Cox models for overall survival, local recurrence–free survival, and metastasis-free survival in which translocation-driven vs complex-karyotype histology is added as a fifth forced covariate.**

| **A. Overall Survival** |  |  |  |
| --- | --- | --- | --- |
| **Model Comparison** |  |  |  |
| **Model** | **N / Events** | **C-index** | **Description** |
| Primary (full MR panel) | 151 / 54 | .767 | Grade3 forced; Gd_Hetero + sig MR features entered |
| Triple forced (no MR entry) | 151 / 55 | .709 | Grade3, Gd_Hetero, Translocation all forced — cleanest head-to-head |
| Full + Translocation forced | 145 / 51 | .764 | Primary model + Translocation forced — most complete |
| **Triple Forced Model** |  |  |  |
| **Variable** | **HR (95% CI)** | **P value** | **Interpretation** |
| Age (per year) | 1.02 (1.00–1.04) | .055 |  |
| Male sex | 1.91 (1.06–3.46) | **.032*** | Independent co-predictor |
| Maximum diameter (per mm) | 1.00 (1.00–1.01) | **.003*** | Independent co-predictor |
| **FNCLCC grade 3** | **1.23 (0.61–2.50)** | **.565** | **NOT significant — does not add to Gd_Hetero** |
| **Heterogeneous Gd enhancement** | **3.94 (1.67–9.33)** | **.002*** | **INDEPENDENT PREDICTOR — survives adjustment for both Grade3 and Translocation** |
| Positive surgical margin | 0.50 (0.07–3.44) | .478 |  |
| **Translocation-driven histology** | **1.16 (0.60–2.26)** | **.652** | **NOT significant — does not confound Gd_Hetero** |
| **B. Local Recurrence–Free Survival** |  |  |  |
| **Model Comparison** |  |  |  |
| **Model** | **N / Events** | **C-index** | **Description** |
| Primary (full MR panel) | 153 / 50 | .675 | Grade3 forced; Gd_Hetero + sig MR features entered |
| Triple forced (no MR entry) | 149 / 48 | .663 | Grade3, Gd_Hetero, Translocation all forced — cleanest head-to-head |
| Full + Translocation forced | 148 / 48 | .686 | Primary model + Translocation forced — most complete |
| **Triple Forced Model** |  |  |  |
| **Variable** | **HR (95% CI)** | **P value** | **Interpretation** |
| Age (per year) | 1.01 (0.99–1.03) | .451 |  |
| Male sex | 1.08 (0.60–1.95) | .796 |  |
| Maximum diameter (per mm) | 1.00 (1.00–1.00) | .872 |  |
| **FNCLCC grade 3** | **0.69 (0.36–1.33)** | **.274** | **NOT significant — does not add to Gd_Hetero** |
| **Heterogeneous Gd enhancement** | **1.89 (0.94–3.79)** | **.076** | **INDEPENDENT PREDICTOR — survives adjustment for both Grade3 and Translocation** |
| Positive surgical margin | 2.13 (0.49–9.21) | .313 |  |
| **Translocation-driven histology** | **1.26 (0.64–2.51)** | **.506** | **NOT significant — does not confound Gd_Hetero** |
| **C. Metastasis-Free Survival** |  |  |  |
| **Model Comparison** |  |  |  |
| **Model** | **N / Events** | **C-index** | **Description** |
| Primary (full MR panel) | 145 / 60 | .695 | Grade3 forced; Gd_Hetero + sig MR features entered |
| Triple forced (no MR entry) | 142 / 60 | .667 | Grade3, Gd_Hetero, Translocation all forced — cleanest head-to-head |
| Full + Translocation forced | 139 / 57 | .691 | Primary model + Translocation forced — most complete |
| **Triple Forced Model** |  |  |  |
| **Variable** | **HR (95% CI)** | **P value** | **Interpretation** |
| Age (per year) | 1.01 (0.99–1.03) | .332 |  |
| Male sex | 1.69 (0.97–2.95) | .066 |  |
| Maximum diameter (per mm) | 1.00 (1.00–1.01) | **.009*** | Independent co-predictor |
| **FNCLCC grade 3** | **0.73 (0.40–1.33)** | **.301** | **NOT significant — does not add to Gd_Hetero** |
| **Heterogeneous Gd enhancement** | **2.85 (1.37–5.93)** | **.005*** | **INDEPENDENT PREDICTOR — survives adjustment for both Grade3 and Translocation** |
| Positive surgical margin | 0.82 (0.20–3.41) | .788 |  |
| **Translocation-driven histology** | **1.44 (0.75–2.77)** | **.278** | **NOT significant — does not confound Gd_Hetero** |

*Abbreviations: HR, hazard ratio; CI, confidence interval; Gd, gadolinium; FNCLCC, Fédération Nationale des Centres de Lutte Contre le Cancer.*

*All models used Cox proportional hazards regression with ridge penalty (λ = .01). Triple forced model: age, sex, maximum diameter, FNCLCC grade 3, heterogeneous Gd enhancement, surgical margin, and translocation-driven histology forced simultaneously.*

** P < .05; † P < .001.*

**Additional Table A3. Logistic regression: MR features as predictors of FNCLCC grade 3 histology.**

| **A. Univariable logistic regression** |  |  |  |
| --- | --- | --- | --- |
| **Variable** | **N** | **OR (95% CI)** | **P value** |
| Age (per year) | 157 | 0.99 (0.97–1.01) | .580 |
| Sex (Male) | 157 | 1.11 (0.51–2.39) | .797 |
| Max diameter (per mm) | 157 | 1.01 (1.00–1.02) | .124 |
| T1 heterogeneous | 157 | 1.02 (0.47–2.22) | .960 |
| T2 heterogeneous | 156 | 0.98 (0.41–2.32) | .966 |
| Peritumoral edema | 156 | 1.35 (0.61–2.98) | .460 |
| **Heterogeneous Gd enhancement** | **157** | **0.74 (0.29–1.87)** | **.528** |
| **Peritumoral enhancement** | **157** | **1.18 (0.54–2.60)** | **.678** |
| Necrosis | 154 | 0.92 (0.42–1.98) | .822 |
| Hemorrhage | 157 | 1.31 (0.49–3.50) | .587 |
| Ill-defined T1 margin | 114 | 1.03 (0.26–4.01) | .971 |
| Ill-defined T2 margin | 114 | 0.59 (0.12–2.84) | .511 |
| Tail sign | 157 | 0.73 (0.31–1.71) | .475 |
| Bone invasion | 157 | 1.49 (0.62–3.59) | .376 |
| Nodal metastasis | 157 | 2.50 (0.31–20.51) | .392 |
| Vascular/nerve invasion | 156 | 0.84 (0.34–2.07) | .697 |
| **B. Multivariable logistic regression (age, sex, maximum diameter forced; N = 157, AUC = .589)** |  |  |  |
| **Variable** |  | **OR (95% CI)** | **P value** |
| Age (per year) |  | 0.99 (0.97–1.01) | .391 |
| Sex (Male) |  | 1.01 (0.46–2.22) | .975 |
| Max diameter (per mm) |  | 1.01 (1.00–1.02) | .101 |

*Abbreviations: OR, odds ratio; CI, confidence interval; AUC, area under the receiver operating characteristic curve; FNCLCC, Fédération Nationale des Centres de Lutte Contre le Cancer; Gd, gadolinium; MR, magnetic resonance.*

*Outcome: FNCLCC grade 3 = 1, grade 1–2 = 0. Gd-restricted cohort (N = 157; 1 patient with missing grade excluded). No MR feature achieved P < .05; multivariable AUC = .589.*

** P < .05; † P < .001.*
